# Supplementary material
Source: publisher figshare collection journal article supplement (https://tandf.figshare.com/ndownloader/files/16210700)
Supplement: Supplementary file 1 [file 16210700]

Research on hydroxyethyl ammonium O,O'-diphenyl dithiophosphate: synthesis, characterization, surface activity and corrosion inhibition performance

Chuan Lai1,2*, Bin Xie2**, Xiaogang Guo3***

1 School of Chemistry and Chemical Engineering, Sichuan University of Arts and Science, Dazhou 635000, China

2 School of Materials Science and Engineering, Sichuan University of Science and Engineering, Zigong 643000, China

3 College of Chemistry and Chemical Engineering, Yangtze Normal University, Chongqing 408100, China

Email: lc860801@163.com

**Supplemental Materials**

**Figure S 1:** FT-IR spectrum of HADD.

**Figure S 2:** 1H NMR spectrum of HADD.
